# Supplementary material
Source: publisher figshare collection journal article supplement (https://karger.figshare.com/ndownloader/files/30895246)

**Figure Title and Legend**

Figure S1 - Assessment of study quality.


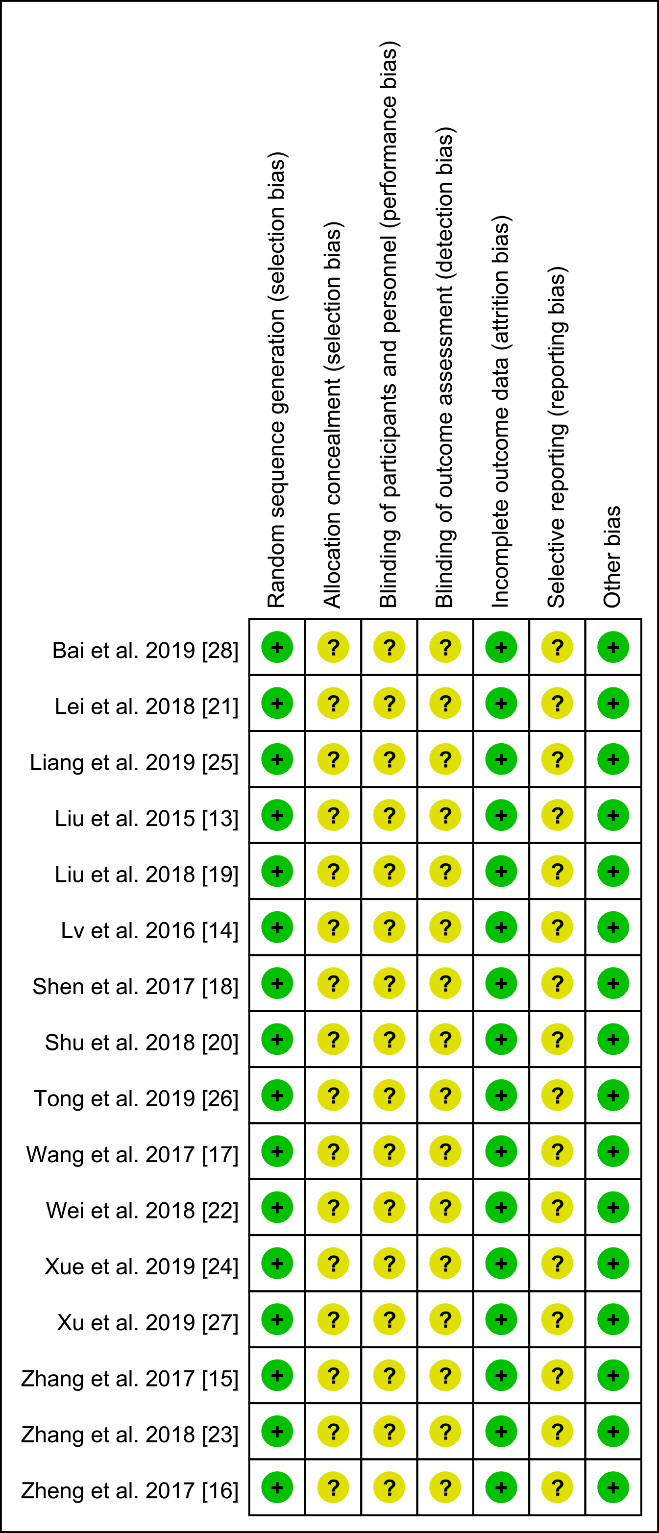

Supplement: Supplementary file 1 [file 30895246]
